# Supplementary material for: Morphological and physiological factors contributing to early vigor in the elite rice cultivar 9,311
Source: PubMed Central journal article supplement (PMC7481250; doi:10.1038/s41598-020-71913-y), 2020-09-09
Supplement: 41598_2020_71913_MOESM1_ESM.pdf [file 41598_2020_71913_MOESM1_ESM.pdf]

## Supplementary Information

### Morphological and physiological factors contributing to early vigor in the elite rice cultivar 9311

Zai Shi<sup>1#</sup>, Tian-Gen Chang<sup>1#\*</sup>, Faming Chen<sup>2,3</sup>, Honglong Zhao<sup>1,2</sup>, Qingfeng Song<sup>1</sup>, Mengyao Wang<sup>1,2</sup>, Yanjie Wang<sup>1,2</sup>, Zhiwei Zhou<sup>4</sup>, Chongrong Wang<sup>5</sup>, Shao-Chuan Zhou<sup>5</sup>, Baoshan Wang<sup>6</sup>, Genyun Chen<sup>1</sup>, Xin-Guang Zhu<sup>1\*</sup>

**Table S1.** Primers of genes used for RT-qPCR in this study.

| Gene     | Gene ID      | Primer  | Sequence (5'-3')          |
|----------|--------------|---------|---------------------------|
| OsNRT2.1 | Os02g0112100 | Forward | GAACAGGAGAAGAGCAAGGG      |
|          |              | Reverse | CAGAATTGTTTACGCCTTAGGC    |
| OsNRT2.4 | Os01g0547600 | Forward | CAGCCTCCTCTGCACGCTCC      |
|          |              | Reverse | CATCATCGTCATCAACATCGC     |
| OsNR1    | Os08g0468100 | Forward | ATGCACCACGGCTTCATCACCC    |
|          |              | Reverse | AAGCCGTTGACCAGCTCGTCCATG  |
| OsNIA1   | Os02g0770800 | Forward | CTCAAGGTGTGGTACGTGG       |
|          |              | Reverse | GAGGTCATAGCCCATCTTCTC     |
| OsAlaAT2 | Os03g0183600 | Forward | TCTTGATGAATCCTCAGGATGG    |
|          |              | Reverse | GTTGCTCATCAAGAATCTGTCC    |
| OsAlaAT4 | Os10g0390600 | Forward | GATGTGTTCTATGCTCTCCGTCT   |
|          |              | Reverse | ATGCTTCATGGAACACATTAAAGCG |

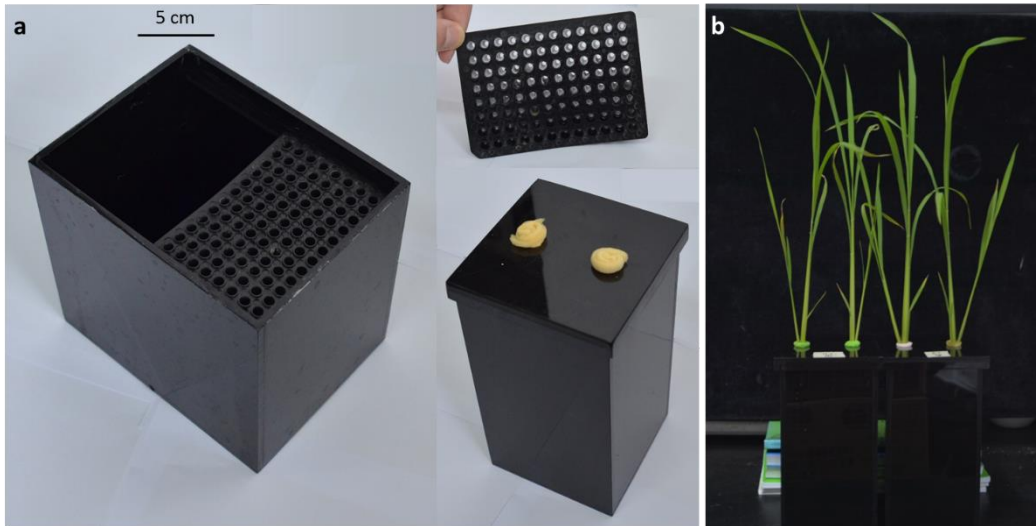

**Figure S1.** Photographs showing different views of a hydroponics system (a) and the working scenario when the hydroponic system is used to grow rice seedlings (b).

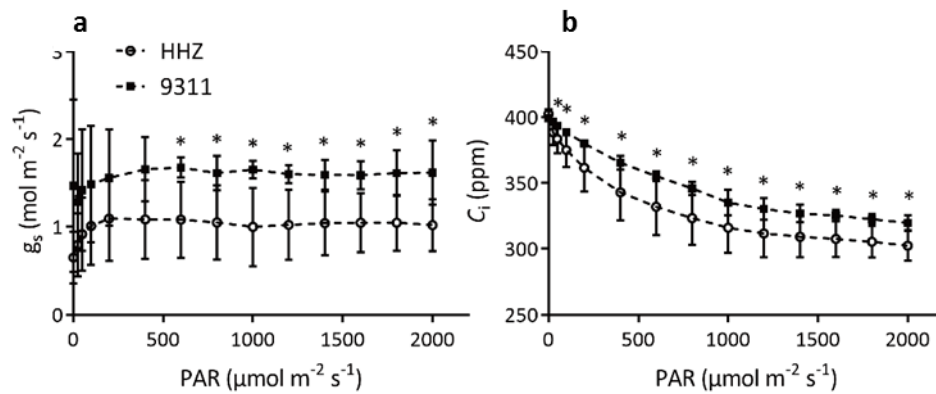

**Figure S2.** Stomatal conductance ( $g_s$ ) and intercellular  $\text{CO}_2$  concentration ( $C_i$ ) of HHZ and 9311 in photosynthetic light intensity response curves. Data presented are mean values with s.d. ( $n = 5$ ). \*  $P < 0.05$  (Student's  $t$ -test).

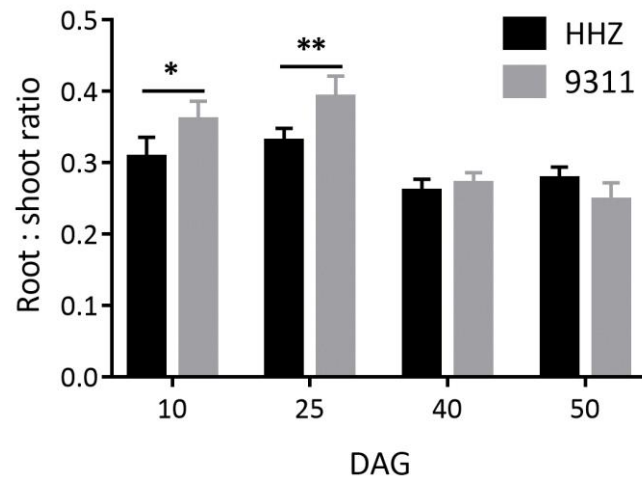

**Figure S3.** Root:shoot ratio of HHZ and 9311 at 10, 25, 40 and 50 DAG. Data presented are mean values with s.d. (n = 5). \*, \*\* P < 0.05 and P < 0.01 (Student's *t*-test), respectively.

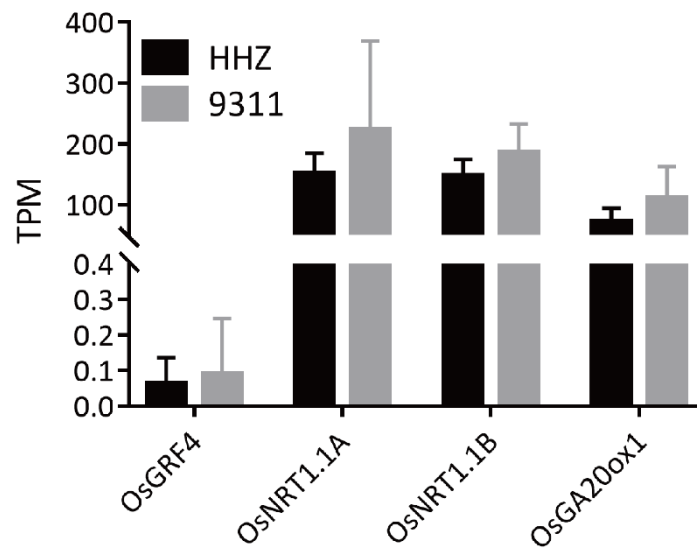

**Figure S4.** Relative expression of four important genes in nitrogen metabolism or early vigor in the root of 9311 and HHZ by RNA-Seq. Data presented are mean values with s.d. (n = 3).
